# Supplementary material for: Theoretical screening of lead-free hybrid organic–inorganic halide double perovskites for solar cells
Source: Royal Society of Chemistry journal article supplement (doi:10.1039/d2tc03507c), 2022-01-01
Supplement: d2tc03507c1.pdf [file d2tc03507c1.pdf]

## **Supporting Information for**

# **Theoretical Screening of Lead-Free Hybrid Organic–Inorganic Halide Double Perovskites for Solar Cells**

Xing Ni<sup>1</sup>, Yuyan Liu<sup>1</sup>, Yujin Ji<sup>1,2\*</sup>, Chunhua Hu<sup>2</sup>, Youyong Li<sup>1,3\*</sup>

<sup>1</sup> Institute of Functional Nano & Soft Materials (FUNSOM), Jiangsu Key Laboratory for Carbon-Based Functional Materials & Devices, Soochow University, Suzhou, Jiangsu 215123, China

<sup>2</sup> 21C Innovation Laboratory, Contemporary Amperex Technology Ltd. (21C LAB), Ningde, Fujian 352199, China

<sup>3</sup> Macao Institute of Materials Science and Engineering, Macau University of Science and Technology, Taipa, Macau SAR 999078, China

\*Corresponding author

Email address: yjji@suda.edu.cn; yyli@suda.edu.cn;

**Table S1.** Benchmarked functional test, including the GGA-level PBE, PBEsol and PW91 and the hybrid-level PBE0 and HSE06 with and without the SOC effect on calculating the band gaps of traditional FAPbI<sub>3</sub>.

| Functional  | w/o SOC        | w/ SOC         |
|-------------|----------------|----------------|
| PBE         | <b>1.53 eV</b> | 0.47 eV        |
| PBEsol      | 1.37 eV        | 0.30 eV        |
| PW91        | <b>1.42 eV</b> | 0.34 eV        |
| HSE06       | 2.00 eV        | 0.93 eV        |
| PBE0        | 2.61 eV        | <b>1.53 eV</b> |
| Exp. [Ref.] | 1.47eV         |                |

Ref. F. Ma, J. Li, W. Li, N. Lin, L. Wang and J. Qiao, *Chem. Sci.*, 2017, 8, 800-805

**Table S2.** Comparisons of the band gaps of 11 stable OIHDPs under the PBE and PBE0+SOC functional.

| OIHDPs                              | PBE     | PBE0+SOC |
|-------------------------------------|---------|----------|
| FA <sub>2</sub> AuAuF <sub>6</sub>  | 1.12 eV | 1.77 eV  |
| MA <sub>2</sub> AuSbCl <sub>6</sub> | 1.36 eV | 2.14 eV  |
| MA <sub>2</sub> AgSbI <sub>6</sub>  | 1.43 eV | 2.10 eV  |
| MA <sub>2</sub> AuSbI <sub>6</sub>  | 1.54 eV | 2.03 eV  |
| FA <sub>2</sub> AgAuBr <sub>6</sub> | 0.17 eV | 1.20 eV  |
| MA <sub>2</sub> AgAuF <sub>6</sub>  | 0.25 eV | 0.24 eV  |
| MA <sub>2</sub> AgAuI <sub>6</sub>  | 0.34 eV | 0.99 eV  |
| MA <sub>2</sub> AgAuBr <sub>6</sub> | 0.35 eV | 1.23 eV  |
| FA <sub>2</sub> AgAuF <sub>6</sub>  | 0.43 eV | 0.90 eV  |
| MA <sub>2</sub> AgAuCl <sub>6</sub> | 0.44 eV | 1.45 eV  |
| FA <sub>2</sub> AgAuCl <sub>6</sub> | 0.53 eV | 1.84 eV  |
